# Supplementary material for: Under-ice availability of phytoplankton lipids is key to freshwater zooplankton winter survival
Source: PubMed Central journal article supplement (PMC5599675; doi:10.1038/s41598-017-10956-0), 2017-09-14
Supplement: 41598_2017_10956_MOESM1_ESM.pdf [file 41598_2017_10956_MOESM1_ESM.pdf]

## Under-ice availability of phytoplankton lipids is key to zooplankton winter survival

Guillaume Grosbois\*<sup>1</sup>, Heather Mariash<sup>1,2</sup>, Tobias Schneider<sup>1</sup> and Milla Rautio<sup>1</sup>

### Supplementary material

#### Table

##### Table S1

Selected fatty acid biomarkers for phytoplankton, terrestrial organic matter and bacteria.

| Fatty acid | Abbrev-iation | Biomarker     | Reference                                                                                                                                                                                                                                                                                                                                                                          |
|------------|---------------|---------------|------------------------------------------------------------------------------------------------------------------------------------------------------------------------------------------------------------------------------------------------------------------------------------------------------------------------------------------------------------------------------------|
| C18:4n-3   | SDA           | Phytoplankton | Cook et al. (2000), Hughes et al. (2005), Ackman (1989), Sleight (1987), Mai et al. (1996), McLeod and Wing (2009), Taipale et al. (2013), Taipale et al. (2015b), Stevens et al. (2004).                                                                                                                                                                                          |
| C20:1n-9   |               | Phytoplankton | Taipale et al. (2015b)                                                                                                                                                                                                                                                                                                                                                             |
| C20:4n-6   | ARA           | Phytoplankton | Paradis and Ackman (1977), Cook et al. (2000), Isay and Busarova (1984), Mai et al. (1996), Nelson et al. (2002), Hughes et al. (2005), Kharlamenko et al. (1995), McLeod and Wing (2009), Taipale et al. (2015b)                                                                                                                                                                  |
| C20:5n-3   | EPA           | Phytoplankton | Berggren et al. (2014), Ackman et al. (1968), Paradis and Ackman (1977), Isay and Busarova (1984), Ackman (1989), Mai et al. (1996), Cook et al. (2000), Nelson et al. (2002), Hughes et al. (2005), Howell et al. (2003), Boschker et al. (2005), Ratledge and Wilkinson (1988), Dunstan et al. (1993), McLeod and Wing (2009), Kharlamenko et al. (1995), Taipale et al. (2015b) |
| C22:6n-3   | DHA           | Phytoplankton | Howell et al. (2003), Sleight (1987), Hamilton (1995), Vazhappilly and Chen (1998), Mansour et al. (1999), Hughes et al. (2005), McLeod and Wing (2009),                                                                                                                                                                                                                           |

|          |               |                                                                                                                                   |
|----------|---------------|-----------------------------------------------------------------------------------------------------------------------------------|
|          |               | Simopoulos (1991), Stevens et al. (2004), McMeans et al. (2015)                                                                   |
| C24:1n-9 | Phytoplankton | Taipale et al. (2015b)                                                                                                            |
| C20:0    | Terrestrial   | Taipale et al. (2015b)                                                                                                            |
| C22:0    | Terrestrial   | Taipale et al. (2015b), Wenzel et al. (2012), McMeans et al. (2015)                                                               |
| C23:0    | Terrestrial   | Taipale et al. (2015b)                                                                                                            |
| C24:0    | Terrestrial   | Taipale et al. (2015b), Zelles (1999), Ruess et al. (2007), Bachok et al. (2003), McLeod and Wing (2009), McMeans et al. (2015)   |
| a-C15:0  | Bacteria      | Haubert et al. (2006), McLeod and Wing (2009), Taipale et al. (2015b), Pancost and Sinninghe Damsté (2003), McMeans et al. (2015) |
| C15:0    | Bacteria      | Taipale et al. (2015b), McMeans et al. (2015)                                                                                     |
| Cy-C17:0 | Bacteria      | Haubert et al. (2006), (Zelles 1997, 1999)                                                                                        |
| i-C15:0  | Bacteria      | Haubert et al. (2006), McLeod and Wing (2009), Taipale et al. (2015b), McMeans et al. (2015)                                      |
| i-C17:0  | Bacteria      | Haubert et al. (2006), Pancost and Sinninghe Damsté (2003), McMeans et al. (2015)                                                 |

**Table S2**

Paired Wilcoxon tests between “Control” and “Starved” treatments per date. p = NA when each replicates had 50 individuals at the beginning of the experiment and no test could be completed.

| # | Date       | Duration (d) | W  | p  | N  |
|---|------------|--------------|----|----|----|
| 1 | 24/11/2012 | 0            | 18 | NA | 12 |
| 2 | 30/11/2012 | 6            | 18 | NA | 12 |

|    |            |     |    |          |    |
|----|------------|-----|----|----------|----|
| 3  | 04/12/2012 | 10  | 16 | 0.806    | 12 |
| 4  | 11/12/2012 | 17  | 24 | 0.372    | 12 |
| 5  | 18/12/2012 | 24  | 23 | 0.462    | 12 |
| 6  | 28/12/2012 | 34  | 16 | 0.808    | 12 |
| 7  | 03/01/2013 | 40  | 23 | 0.462    | 12 |
| 8  | 08/01/2013 | 45  | 23 | 0.462    | 12 |
| 9  | 15/01/2013 | 52  | 23 | 0.462    | 12 |
| 10 | 22/01/2013 | 59  | 23 | 0.462    | 12 |
| 11 | 29/01/2013 | 66  | 28 | 0.128    | 12 |
| 12 | 05/02/2013 | 73  | 36 | 0.005 ** | 12 |
| 13 | 12/02/2013 | 80  | 36 | 0.005 ** | 12 |
| 14 | 19/02/2013 | 87  | 36 | 0.004 ** | 12 |
| 15 | 27/02/2013 | 94  | 36 | 0.004 ** | 12 |
| 16 | 05/03/2013 | 101 | 36 | 0.004 ** | 12 |
| 17 | 12/03/2013 | 108 | 36 | 0.004 ** | 12 |
| 18 | 19/03/2013 | 115 | 36 | 0.004 ** | 12 |
| 19 | 26/03/2013 | 122 | 36 | 0.004 ** | 12 |
| 20 | 02/04/2013 | 129 | 36 | 0.004 ** | 12 |
| 21 | 10/04/2013 | 137 | 36 | 0.004 ** | 12 |
| 22 | 16/04/2013 | 143 | 36 | 0.004 ** | 12 |
| 23 | 23/04/2013 | 150 | 36 | 0.004 ** | 12 |
| 24 | 29/04/2013 | 156 | 36 | 0.004 ** | 12 |
| 25 | 05/05/2013 | 162 | 36 | 0.004 ** | 12 |

**Table S3**

Raw individual FA ( $\mu\text{g FA mg dry weight}^{-1}$ ) data

| Date       | Month     | Material    | Species                 | C14:0 | C14:1n-5 | C15:0 | C15:1n-5 | C16:0 | C16:1n-7 | C17:0 | C17:1n-7 | C18:0 | C18:1n-7 | C18:1n-9 | C18:2n-6 | C18:3n-3 | C18:3n-6 | C18:4n-3 | C20:0 | C20:1n-9 | C20:1n-11 | C20:2n-6 | C20:3n-3 | C20:3n-6 | C20:4n-6 | C20:5n-3 | C21:0 | C22:0 | C22:1n-9 | C22:2n-6 | C22:6n-3 | C23:0 | C24:0 | C24:1n-9 | i-C15:0 | a-C15:0                                                                                                               | i-C16:0 | i-C17:0 | C17:0* | 2-OH C14:0 | 3-OH C14:0 | 2-OH C16:0 |      |
|------------|-----------|-------------|-------------------------|-------|----------|-------|----------|-------|----------|-------|----------|-------|----------|----------|----------|----------|----------|----------|-------|----------|-----------|----------|----------|----------|----------|----------|-------|-------|----------|----------|----------|-------|-------|----------|---------|-----------------------------------------------------------------------------------------------------------------------|---------|---------|--------|------------|------------|------------|------|
| 19/05/2011 | May       | Zooplankton | <i>Cyclops scutifer</i> | 0.84  | 0.00     | 0.12  | 0.00     | 4.19  | 0.03     | 0.00  | 0.03     | 1.43  | 0.00     | 2.05     | 0.91     | 1.05     | 0.23     | 1.02     | 0.06  | 0.00     | 0.09      | 0.06     | 0.12     | 0.03     | 0.18     | 1.55     | 0.00  | 0.03  | 0.03     | 0.00     | 3.35     | 0.00  | 0.03  | 0.15     | i-C15:0 | a-C15:0 <td>i-C16:0</td> <td>i-C17:0</td> <td>C17:0*</td> <td>2-OH C14:0</td> <td>3-OH C14:0</td> <td>2-OH C16:0</td> | i-C16:0 | i-C17:0 | C17:0* | 2-OH C14:0 | 3-OH C14:0 | 2-OH C16:0 |      |
| 19/05/2011 | May       | Zooplankton | <i>Cyclops scutifer</i> | 1.02  | 0.00     | 0.12  | 0.00     | 4.07  | 0.07     | 0.17  | 0.02     | 1.25  | 0.02     | 1.73     | 0.79     | 0.87     | 0.19     | 0.79     | 0.05  | 0.02     | 0.07      | 0.05     | 0.07     | 0.02     | 0.24     | 1.40     | 0.00  | 0.02  | 0.02     | 0.00     | 2.76     | 0.00  | 0.02  | 0.10     | 0.10    | 0.05                                                                                                                  | 0.00    | 0.07    | 0.00   | 0.02       | 0.00       | 0.00       |      |
| 22/06/2011 | June      | Zooplankton | <i>Cyclops scutifer</i> | 2.90  | 0.03     | 0.41  | 0.02     | 6.97  | 2.85     | 0.31  | 0.07     | 2.49  | 0.04     | 3.08     | 2.24     | 2.28     | 0.01     | 1.60     | 0.20  | 0.02     | 0.18      | 0.27     | 0.39     | 0.12     | 1.21     | 3.03     | 0.03  | 0.14  | 0.04     | 0.02     | 4.44     | 0.02  | 0.04  | 0.18     | 0.29    | 0.10                                                                                                                  | 0.01    | 0.15    | 0.00   | 0.05       | 0.03       | 0.01       | 0.00 |
| 22/06/2011 | June      | Zooplankton | <i>Cyclops scutifer</i> | 1.87  | 0.01     | 0.28  | 0.01     | 5.00  | 1.96     | 0.23  | 0.04     | 1.77  | 0.02     | 1.92     | 1.37     | 1.54     | 0.00     | 1.05     | 0.11  | 0.01     | 0.11      | 0.15     | 0.23     | 0.07     | 0.69     | 1.93     | 0.01  | 0.09  | 0.02     | 0.01     | 3.01     | 0.01  | 0.03  | 0.13     | 0.18    | 0.06                                                                                                                  | 0.00    | 0.10    | 0.00   | 0.03       | 0.01       | 0.00       |      |
| 13/07/2011 | July      | Zooplankton | <i>Cyclops scutifer</i> | 3.27  | 0.02     | 0.68  | 0.03     | 8.82  | 4.53     | 0.55  | 0.14     | 3.03  | 0.06     | 4.60     | 2.98     | 3.77     | 0.01     | 2.24     | 0.35  | 0.04     | 0.39      | 0.51     | 0.84     | 0.25     | 1.89     | 4.28     | 0.05  | 0.26  | 0.08     | 0.03     | 5.44     | 0.03  | 0.09  | 0.43     | 0.46    | 0.15                                                                                                                  | 0.01    | 0.25    | 0.00   | 0.07       | 0.02       | 0.00       |      |
| 13/07/2011 | July      | Zooplankton | <i>Cyclops scutifer</i> | 2.31  | 0.02     | 0.57  | 0.02     | 8.46  | 4.07     | 0.54  | 0.13     | 3.19  | 0.05     | 4.70     | 3.21     | 3.78     | 0.01     | 2.23     | 0.33  | 0.03     | 0.36      | 0.46     | 0.78     | 0.23     | 1.80     | 4.25     | 0.04  | 0.23  | 0.07     | 0.03     | 5.54     | 0.03  | 0.09  | 0.40     | 0.36    | 0.12                                                                                                                  | 0.01    | 0.23    | 0.00   | 0.06       | 0.02       | 0.00       |      |
| 17/08/2011 | August    | Zooplankton | <i>Cyclops scutifer</i> | 1.71  | 0.01     | 0.53  | 0.02     | 6.82  | 3.65     | 0.58  | 0.12     | 2.38  | 0.04     | 3.41     | 1.99     | 2.65     | 0.01     | 1.15     | 0.29  | 0.03     | 0.29      | 0.33     | 0.49     | 0.16     | 1.27     | 2.32     | 0.04  | 0.21  | 0.06     | 0.02     | 3.76     | 0.03  | 0.09  | 0.39     | 0.31    | 0.11                                                                                                                  | 0.01    | 0.21    | 0.00   | 0.04       | 0.02       | 0.00       |      |
| 17/08/2011 | August    | Zooplankton | <i>Cyclops scutifer</i> | 3.12  | 0.03     | 0.75  | 0.03     | 8.10  | 4.66     | 0.62  | 0.15     | 2.54  | 0.05     | 3.76     | 2.18     | 2.94     | 0.01     | 1.34     | 0.31  | 0.03     | 0.27      | 0.36     | 0.57     | 0.19     | 1.36     | 2.54     | 0.04  | 0.22  | 0.07     | 0.02     | 3.73     | 0.03  | 0.09  | 0.42     | 0.49    | 0.16                                                                                                                  | 0.01    | 0.23    | 0.00   | 0.05       | 0.02       | 0.00       |      |
| 26/10/2011 | October   | Zooplankton | <i>Cyclops scutifer</i> | 1.92  | 0.00     | 0.21  | 0.00     | 4.79  | 2.49     | 0.00  | 0.03     | 1.51  | 0.00     | 1.05     | 0.81     | 0.97     | 0.27     | 1.59     | 0.08  | 0.00     | 0.05      | 0.08     | 0.11     | 0.08     | 0.35     | 1.62     | 0.03  | 0.08  | 0.03     | 0.00     | 2.79     | 0.00  | 0.05  | 0.14     | 0.24    | 0.05                                                                                                                  | 0.00    | 0.11    | 0.00   | 0.00       | 0.00       | 0.00       |      |
| 12/12/2011 | December  | Zooplankton | <i>Cyclops scutifer</i> | 0.46  | 0.01     | 0.04  | 0.00     | 2.44  | 1.53     | 0.00  | 0.02     | 1.44  | 0.02     | 3.50     | 1.52     | 1.35     | 0.27     | 3.16     | 0.20  | 0.04     | 0.28      | 0.22     | 0.28     | 0.36     | 0.93     | 4.03     | 0.06  | 0.34  | 0.08     | 0.02     | 7.36     | 0.03  | 0.27  | 0.59     | 0.05    | 0.02                                                                                                                  | 0.04    | 0.14    | 0.00   | 0.02       | 0.01       | 0.00       |      |
| 12/12/2011 | December  | Zooplankton | <i>Cyclops scutifer</i> | 4.58  | 0.04     | 0.23  | 0.01     | 5.61  | 4.77     | 0.01  | 0.05     | 1.55  | 0.02     | 4.03     | 1.86     | 1.74     | 0.35     | 4.16     | 0.17  | 0.03     | 0.24      | 0.20     | 0.24     | 0.31     | 0.91     | 3.86     | 0.05  | 0.25  | 0.06     | 0.02     | 6.18     | 0.02  | 0.20  | 0.45     | 0.42    | 0.12                                                                                                                  | 0.12    | 0.24    | 0.00   | 0.02       | 0.01       | 0.00       |      |
| 19/01/2012 | January   | Zooplankton | <i>Cyclops scutifer</i> | 0.22  | 0.01     | 0.06  | 0.01     | 3.57  | 2.18     | 0.00  | 0.03     | 1.70  | 0.01     | 4.20     | 1.85     | 1.83     | 0.29     | 3.55     | 0.21  | 0.04     | 0.32      | 0.28     | 0.35     | 0.34     | 1.03     | 4.36     | 0.06  | 0.31  | 0.10     | 0.03     | 7.56     | 0.03  | 0.23  | 0.60     | 0.07    | 0.03                                                                                                                  | 0.06    | 0.20    | 0.00   | 0.03       | 0.01       | 0.00       |      |
| 19/01/2012 | January   | Zooplankton | <i>Cyclops scutifer</i> | 7.44  | 0.04     | 0.39  | 0.03     | 8.01  | 6.64     | 0.01  | 0.08     | 2.14  | 0.04     | 5.28     | 2.65     | 2.68     | 0.43     | 5.35     | 0.24  | 0.05     | 0.35      | 0.33     | 0.41     | 0.40     | 1.25     | 5.07     | 0.07  | 0.30  | 0.11     | 0.03     | 8.36     | 0.03  | 0.24  | 0.61     | 0.76    | 0.22                                                                                                                  | 0.20    | 0.37    | 0.00   | 0.04       | 0.03       | 0.00       |      |
| 29/02/2012 | February  | Zooplankton | <i>Cyclops scutifer</i> | 9.32  | 0.07     | 0.49  | 0.04     | 7.75  | 7.12     | 0.01  | 0.10     | 2.00  | 0.06     | 5.53     | 2.54     | 2.41     | 0.39     | 4.51     | 0.23  | 0.05     | 0.32      | 0.33     | 0.36     | 0.38     | 1.24     | 4.33     | 0.06  | 0.31  | 0.11     | 0.03     | 6.99     | 0.03  | 0.22  | 0.64     | 0.93    | 0.27                                                                                                                  | 0.22    | 0.37    | 0.00   | 0.05       | 0.03       | 0.00       |      |
| 29/02/2012 | February  | Zooplankton | <i>Cyclops scutifer</i> | 5.71  | 0.02     | 0.41  | 0.02     | 8.08  | 0.37     | 0.01  | 0.08     | 2.48  | 0.05     | 6.14     | 2.70     | 2.46     | 0.40     | 4.52     | 0.26  | 0.06     | 0.38      | 0.35     | 0.40     | 0.42     | 1.37     | 4.78     | 0.07  | 0.35  | 0.12     | 0.04     | 8.31     | 0.04  | 0.30  | 0.83     | 0.66    | 0.21                                                                                                                  | 0.20    | 0.40    | 0.00   | 0.05       | 0.02       | 0.00       |      |
| 04/04/2012 | April     | Zooplankton | <i>Cyclops scutifer</i> | 5.86  | 0.01     | 0.49  | 0.06     | 6.89  | 6.21     | 0.00  | 0.15     | 1.80  | 0.02     | 4.18     | 1.94     | 2.10     | 0.27     | 3.24     | 0.16  | 0.03     | 0.23      | 0.22     | 0.24     | 0.22     | 0.81     | 3.25     | 0.03  | 0.20  | 0.08     | 0.02     | 5.02     | 0.02  | 0.14  | 0.49     | 0.64    | 0.23                                                                                                                  | 0.00    | 0.28    | 0.00   | 0.03       | 0.02       | 0.00       |      |
| 04/04/2012 | April     | Zooplankton | <i>Cyclops scutifer</i> | 6.14  | 0.02     | 0.49  | 0.05     | 7.00  | 6.30     | 0.00  | 0.14     | 1.73  | 0.04     | 4.16     | 2.05     | 2.26     | 0.28     | 3.24     | 0.17  | 0.03     | 0.23      | 0.24     | 0.25     | 0.24     | 0.88     | 3.47     | 0.04  | 0.20  | 0.08     | 0.02     | 5.27     | 0.02  | 0.14  | 0.52     | 0.69    | 0.24                                                                                                                  | 0.18    | 0.29    | 0.00   | 0.03       | 0.02       | 0.00       |      |
| 23/05/2012 | May       | Zooplankton | <i>Cyclops scutifer</i> | 2.15  | 0.01     | 0.18  | 0.00     | 4.52  | 1.85     | 0.00  | 0.02     | 1.27  | 0.02     | 1.21     | 1.19     | 1.12     | 0.00     | 1.13     | 0.07  | 0.00     | 0.08      | 0.10     | 0.13     | 0.06     | 0.79     | 2.35     | 0.01  | 0.07  | 0.03     | 0.01     | 5.30     | 0.01  | 0.04  | 0.18     | 0.16    | 0.08                                                                                                                  | 0.00    | 0.07    | 0.00   | 0.02       | 0.00       |            |      |
| 23/05/2012 | May       | Zooplankton | <i>Cyclops scutifer</i> | 1.24  | 0.00     | 0.15  | 0.01     | 3.89  | 1.58     | 0.00  | 0.04     | 1.33  | 0.02     | 1.11     | 1.13     | 1.02     | 0.00     | 0.97     | 0.07  | 0.00     | 0.08      | 0.10     | 0.12     | 0.06     | 0.83     | 2.38     | 0.01  | 0.07  | 0.02     | 0.01     | 5.39     | 0.01  | 0.05  | 0.18     | 0.10    | 0.05                                                                                                                  | 0.00    | 0.06    | 0.00   | 0.02       | 0.00       |            |      |
| 19/05/2011 | May       | Zooplankton | <i>Daphnia</i>          | 1.45  | 0.02     | 0.13  | 0.00     | 5.07  | 0.51     | 0.00  | 0.07     | 1.40  | 0.00     | 3.88     | 1.35     | 2.30     | 0.38     | 3.36     | 0.02  | 0.00     | 0.00      | 0.02     | 0.00     | 0.02     | 0.80     | 3.93     | 0.00  | 0.02  | 0.00     | 0.00     | 0.22     | 0.00  | 0.00  | 0.00     | 0.15    | 0.09                                                                                                                  | 0.00    | 0.09    | 0.11   | 0.02       | 0.00       | 0.00       |      |
| 22/06/2011 | June      | Zooplankton | <i>Daphnia</i>          | 0.49  | 0.01     | 0.12  | 0.00     | 3.25  | 0.06     | 0.13  | 0.02     | 0.90  | 0.00     | 2.71     | 0.28     | 0.13     | 0.09     | 0.00     | 0.00  | 0.00     | 0.00      | 0.00     | 0.00     | 0.00     | 0.00     | 0.05     | 0.04  | 0.00  | 0.01     | 0.00     | 0.00     | 0.00  | 0.00  | 0.00     | 0.00    | 0.00                                                                                                                  | 0.00    | 0.00    | 0.00   | 0.00       | 0.00       | 0.00       |      |
| 22/06/2011 | June      | Zooplankton | <i>Daphnia</i>          | 0.63  | 0.01     | 0.17  | 0.01     | 3.48  | 1.92     | 0.00  | 0.02     | 1.40  | 0.00     | 3.08     | 1.37     | 0.76     | 0.00     | 3.38     | 0.05  | 0.00     | 0.00      | 0.01     | 0.01     | 0.01     | 0.64     | 0.97     | 0.00  | 0.02  | 0.00     | 0.00     | 0.04     | 0.03  | 0.00  | 0.01     | 0.00    | 0.04                                                                                                                  | 0.00    | 0.00    | 0.00   | 0.00       | 0.00       | 0.00       | 0.00 |
| 13/07/2011 | July      | Zooplankton | <i>Daphnia</i>          | 0.49  | 0.00     | 0.14  | 0.02     | 3.08  | 0.12     | 0.18  | 0.04     | 1.07  | 0.00     | 2.36     | 0.46     | 0.32     | 0.14     | 0.09     | 0.03  | 0.00     | 0.00      | 0.00     | 0.00     | 0.00     | 0.00     | 0.14     | 1.14  | 0.00  | 0.02     | 0.00     | 0.00     | 0.00  | 0.00  | 0.00     | 0.00    | 0.00                                                                                                                  | 0.00    | 0.00    | 0.00   | 0.00       | 0.00       | 0.00       |      |
| 13/07/2011 | July      | Zooplankton | <i>Daphnia</i>          | 0.60  | 0.00     | 0.18  | 0.01     | 3.67  | 1.18     | 0.22  | 0.04     | 1.45  | 0.00     | 2.80     | 0.83     | 0.96     | 0.00     | 0.43     | 0.02  | 0.00     | 0.00      | 0.01     | 0.01     | 0.01     | 0.65     | 1.11     | 0.00  | 0.03  | 0.00     | 0.00     | 0.04     | 0.00  | 0.01  | 0.00     | 0.12    | 0.04                                                                                                                  | 0.00    | 0.07    | 0.00   | 0.01       | 0.00       | 0.00       |      |
| 17/08/2011 | August    | Zooplankton | <i>Daphnia</i>          | 0.79  | 0.02     | 0.23  | 0.00     | 4.23  | 3.05     | 0.28  | 0.04     | 1.20  | 0.00     | 3.09     | 0.58     | 0.58     | 0.00     | 1.15     | 0.02  | 0.00     | 0.00      | 0.00     | 0.00     | 0.00     | 0.24     | 0.24     | 0.00  | 0.02  | 0.00     | 0.00     | 0.00     | 0.00  | 0.00  | 0.00     | 0.00    | 0.15                                                                                                                  | 0.04    | 0.00    | 0.06   | 0.00       | 0.00       | 0.00       |      |
| 17/08/2011 | August    | Zooplankton | <i>Daphnia</i>          | 0.15  | 0.00     | 0.13  | 0.00     | 3.07  | 0.13     | 0.23  | 0.05     | 1.10  | 0.00     | 2.60     | 0.25     | 0.15     | 0.18     | 0.00     | 0.03  | 0.00     | 0.00      | 0.00     | 0.00     | 0.00     | 0.05     | 0.05     | 0.00  | 0.03  | 0.00     | 0.00     | 0.00     | 0.00  | 0.00  | 0.00     | 0.00    | 0.05                                                                                                                  | 0.03    | 0.03    | 0.05   | 0.00       | 0.00       |            |      |
| 15/09/2011 | September | Zooplankton | <i>Daphnia</i>          | 0.09  | 0.01     | 0.07  | 0.01     | 2.53  | 0.03     | 0.17  | 0.02     | 0.86  | 0.00     | 3.08     | 0.23     | 0.11     |          |          |       |          |           |          |          |          |          |          |       |       |          |          |          |       |       |          |         |                                                                                                                       |         |         |        |            |            |            |      |

|            |           |             |                               |      |      |      |      |       |      |      |      |      |      |      |      |      |      |       |      |      |      |      |      |      |      |       |      |      |      |      |       |      |      |      |      |      |      |      |      |      |      |      |      |
|------------|-----------|-------------|-------------------------------|------|------|------|------|-------|------|------|------|------|------|------|------|------|------|-------|------|------|------|------|------|------|------|-------|------|------|------|------|-------|------|------|------|------|------|------|------|------|------|------|------|------|
| 26/10/2011 | October   | Zooplankton | <i>Leptodiaptomus minutus</i> | 0.62 | 0.01 | 0.17 | 0.01 | 6.03  | 2.88 | 0.01 | 0.05 | 1.73 | 0.04 | 3.41 | 2.68 | 4.59 | 0.48 | 9.75  | 0.33 | 0.00 | 0.15 | 0.27 | 0.03 | 0.08 | 1.56 | 5.47  | 0.03 | 0.30 | 0.07 | 0.01 | 5.70  | 0.04 | 0.04 | 0.41 | 0.15 | 0.07 | 0.09 | 0.21 | 0.22 | 0.05 | 0.01 | 0.00 |      |
| 12/12/2011 | December  | Zooplankton | <i>Leptodiaptomus minutus</i> | 2.60 | 0.02 | 0.30 | 0.01 | 7.99  | 4.77 | 0.01 | 0.02 | 2.23 | 0.05 | 5.76 | 5.18 | 6.91 | 0.78 | 16.49 | 0.44 | 0.01 | 0.08 | 0.42 | 0.05 | 0.17 | 2.54 | 9.20  | 0.05 | 0.37 | 0.08 | 0.02 | 10.47 | 0.06 | 0.08 | 0.57 | 0.37 | 0.17 | 0.16 | 0.27 | 0.31 | 0.08 | 0.01 | 0.00 |      |
| 12/12/2011 | December  | Zooplankton | <i>Leptodiaptomus minutus</i> | 2.75 | 0.03 | 0.28 | 0.01 | 7.53  | 4.54 | 0.01 | 0.02 | 1.73 | 0.03 | 5.58 | 4.62 | 6.90 | 0.78 | 16.46 | 0.44 | 0.01 | 0.08 | 0.42 | 0.05 | 0.17 | 2.56 | 9.34  | 0.04 | 0.38 | 0.08 | 0.02 | 10.55 | 0.05 | 0.08 | 0.59 | 0.35 | 0.15 | 0.15 | 0.26 | 0.31 | 0.08 | 0.01 | 0.00 |      |
| 19/01/2012 | January   | Zooplankton | <i>Leptodiaptomus minutus</i> | 1.22 | 0.01 | 0.24 | 0.00 | 8.14  | 4.19 | 0.01 | 0.11 | 2.06 | 0.06 | 6.25 | 5.41 | 8.22 | 0.82 | 17.98 | 0.45 | 0.01 | 0.08 | 0.46 | 0.05 | 0.17 | 2.86 | 10.78 | 0.05 | 0.42 | 0.09 | 0.02 | 11.40 | 0.07 | 0.10 | 0.68 | 0.24 | 0.10 | 0.14 | 0.27 | 0.37 | 0.09 | 0.01 | 0.00 |      |
| 19/01/2012 | January   | Zooplankton | <i>Leptodiaptomus minutus</i> | 9.85 | 0.07 | 0.61 | 0.02 | 11.42 | 7.56 | 0.01 | 0.03 | 1.93 | 0.03 | 6.89 | 5.82 | 8.95 | 0.95 | 20.04 | 0.43 | 0.01 | 0.08 | 0.46 | 0.05 | 0.18 | 2.86 | 10.79 | 0.05 | 0.39 | 0.09 | 0.02 | 11.03 | 0.06 | 0.08 | 0.65 | 0.97 | 0.41 | 0.27 | 0.36 | 0.40 | 0.10 | 0.01 | 0.00 |      |
| 29/02/2012 | February  | Zooplankton | <i>Leptodiaptomus minutus</i> | 8.69 | 0.03 | 0.60 | 0.02 | 11.72 | 7.71 | 0.01 | 0.03 | 2.18 | 0.08 | 7.57 | 6.34 | 9.36 | 0.94 | 18.97 | 0.46 | 0.01 | 0.10 | 0.50 | 0.06 | 0.01 | 3.09 | 11.11 | 0.05 | 0.45 | 0.11 | 0.02 | 10.82 | 0.06 | 0.08 | 0.77 | 0.95 | 0.40 | 0.28 | 0.38 | 0.42 | 0.11 | 0.01 | 0.00 |      |
| 04/04/2012 | April     | Zooplankton | <i>Leptodiaptomus minutus</i> | 7.39 | 0.03 | 0.48 | 0.02 | 9.08  | 0.26 | 0.02 | 0.11 | 1.72 | 0.02 | 5.79 | 4.38 | 6.00 | 0.54 | 9.22  | 0.26 | 0.01 | 0.18 | 0.30 | 0.03 | 0.11 | 1.99 | 7.32  | 0.03 | 0.28 | 0.06 | 0.02 | 7.14  | 0.04 | 0.05 | 0.58 | 0.82 | 0.33 | 0.20 | 0.28 | 0.28 | 0.08 | 0.01 | 0.00 |      |
| 04/04/2012 | April     | Zooplankton | <i>Leptodiaptomus minutus</i> | 5.97 | 0.03 | 0.43 | 0.02 | 8.55  | 0.26 | 0.02 | 0.09 | 1.66 | 0.06 | 5.42 | 4.08 | 5.54 | 0.49 | 8.52  | 0.24 | 0.01 | 0.16 | 0.27 | 0.03 | 0.09 | 1.87 | 6.91  | 0.03 | 0.26 | 0.05 | 0.01 | 6.74  | 0.03 | 0.04 | 0.55 | 0.69 | 0.28 | 0.18 | 0.25 | 0.25 | 0.08 | 0.01 | 0.00 |      |
| 23/05/2012 | May       | Zooplankton | <i>Leptodiaptomus minutus</i> | 1.95 | 0.00 | 0.11 | 0.00 | 4.39  | 1.59 | 0.00 | 0.01 | 1.31 | 0.01 | 1.89 | 1.76 | 1.19 | 0.00 | 1.37  | 0.06 | 0.00 | 0.00 | 0.10 | 0.01 | 0.02 | 1.13 | 2.66  | 0.01 | 0.07 | 0.01 | 0.00 | 5.30  | 0.01 | 0.01 | 0.22 | 0.17 | 0.10 | 0.00 | 0.07 | 0.00 | 0.04 | 0.00 | 0.00 |      |
| 23/05/2012 | May       | Zooplankton | <i>Leptodiaptomus minutus</i> | 2.21 | 0.00 | 0.11 | 0.00 | 4.90  | 1.81 | 0.01 | 0.02 | 1.70 | 0.02 | 2.16 | 2.07 | 1.44 | 0.17 | 1.70  | 0.08 | 0.00 | 0.03 | 0.11 | 0.01 | 0.03 | 1.26 | 2.93  | 0.01 | 0.09 | 0.01 | 0.00 | 5.58  | 0.01 | 0.01 | 0.23 | 0.18 | 0.10 | 0.00 | 0.08 | 0.00 | 0.05 | 0.00 | 0.00 |      |
| 19/05/2011 | May       | Zooplankton | <i>Mesocyclops edax</i>       | 1.71 | 0.00 | 0.24 | 0.00 | 5.18  | 2.01 | 0.00 | 0.02 | 1.68 | 0.02 | 2.09 | 0.97 | 1.14 | 0.00 | 1.14  | 0.07 | 0.05 | 0.00 | 0.05 | 0.10 | 0.05 | 0.41 | 1.85  | 0.00 | 0.05 | 0.02 | 0.00 | 3.01  | 0.02 | 0.05 | 0.12 | 0.17 | 0.07 | 0.00 | 0.15 | 0.00 | 0.02 | 0.00 | 0.00 |      |
| 19/05/2011 | May       | Zooplankton | <i>Mesocyclops edax</i>       | 0.95 | 0.00 | 0.15 | 0.00 | 4.99  | 0.20 | 0.25 | 0.05 | 2.33 | 0.05 | 1.87 | 0.66 | 0.71 | 0.35 | 0.56  | 0.05 | 0.05 | 0.00 | 0.05 | 0.05 | 0.05 | 0.25 | 0.92  | 0.00 | 0.05 | 0.00 | 0.00 | 1.17  | 0.00 | 0.05 | 0.05 | 0.15 | 0.05 | 0.05 | 0.15 | 0.05 | 0.00 | 0.00 | 0.00 | 0.00 |
| 22/06/2011 | June      | Zooplankton | <i>Mesocyclops edax</i>       | 3.02 | 0.02 | 0.29 | 0.00 | 6.52  | 2.68 | 0.31 | 0.04 | 2.51 | 0.05 | 3.10 | 1.85 | 1.45 | 0.01 | 0.99  | 0.15 | 0.05 | 0.11 | 0.12 | 0.10 | 0.05 | 0.72 | 1.14  | 0.02 | 0.12 | 0.02 | 0.01 | 0.98  | 0.01 | 0.03 | 0.05 | 0.27 | 0.10 | 0.00 | 0.18 | 0.00 | 0.04 | 0.01 | 0.00 |      |
| 22/06/2011 | June      | Zooplankton | <i>Mesocyclops edax</i>       | 2.55 | 0.01 | 0.29 | 0.00 | 6.25  | 2.61 | 0.32 | 0.05 | 2.51 | 0.04 | 3.28 | 2.32 | 1.87 | 0.01 | 1.42  | 0.20 | 0.06 | 0.15 | 0.19 | 0.18 | 0.08 | 1.14 | 2.07  | 0.03 | 0.19 | 0.04 | 0.01 | 2.62  | 0.02 | 0.06 | 0.15 | 0.27 | 0.09 | 0.00 | 0.17 | 0.00 | 0.04 | 0.01 | 0.00 |      |
| 13/07/2011 | July      | Zooplankton | <i>Mesocyclops edax</i>       | 1.16 | 0.00 | 0.58 | 0.03 | 5.30  | 0.94 | 0.56 | 0.05 | 1.89 | 0.03 | 1.53 | 1.15 | 1.81 | 0.00 | 0.74  | 0.08 | 0.03 | 0.05 | 0.05 | 0.10 | 0.03 | 0.20 | 1.20  | 0.00 | 0.05 | 0.03 | 0.00 | 1.15  | 0.00 | 0.03 | 0.03 | 0.15 | 0.05 | 0.00 | 0.13 | 0.00 | 0.00 | 0.00 | 0.00 |      |
| 13/07/2011 | July      | Zooplankton | <i>Mesocyclops edax</i>       | 1.10 | 0.03 | 0.32 | 0.00 | 5.55  | 0.22 | 0.35 | 0.03 | 2.07 | 0.03 | 1.82 | 0.87 | 0.22 | 0.33 | 0.08  | 0.03 | 0.05 | 0.05 | 0.05 | 0.03 | 0.03 | 0.16 | 3.00  | 0.00 | 0.08 | 0.03 | 0.00 | 0.25  | 0.00 | 0.03 | 0.06 | 0.14 | 0.05 | 0.00 | 0.14 | 0.00 | 0.03 | 0.00 | 0.00 |      |
| 17/08/2011 | August    | Zooplankton | <i>Mesocyclops edax</i>       | 0.35 | 0.00 | 0.32 | 0.00 | 4.62  | 0.36 | 0.59 | 0.04 | 1.99 | 0.00 | 1.27 | 0.60 | 1.07 | 0.00 | 0.32  | 0.04 | 0.00 | 0.00 | 0.04 | 0.08 | 0.00 | 0.20 | 0.80  | 0.00 | 0.04 | 0.00 | 0.00 | 0.96  | 0.00 | 0.04 | 0.04 | 0.08 | 0.04 | 0.00 | 0.08 | 0.00 | 0.00 | 0.00 | 0.00 |      |
| 17/08/2011 | August    | Zooplankton | <i>Mesocyclops edax</i>       | 1.01 | 0.00 | 0.44 | 0.00 | 5.18  | 0.27 | 0.58 | 0.07 | 2.08 | 0.00 | 1.70 | 0.61 | 1.16 | 0.00 | 0.37  | 0.07 | 0.00 | 0.00 | 0.03 | 0.07 | 0.03 | 0.31 | 0.75  | 0.00 | 0.03 | 0.00 | 0.00 | 0.79  | 0.00 | 0.03 | 0.03 | 0.14 | 0.07 | 0.07 | 0.14 | 0.00 | 0.00 | 0.00 | 0.00 | 0.00 |
| 15/09/2011 | September | Zooplankton | <i>Mesocyclops edax</i>       | 1.02 | 0.00 | 0.24 | 0.00 | 5.97  | 1.11 | 0.28 | 0.04 | 2.70 | 0.00 | 1.55 | 0.44 | 0.24 | 0.28 | 0.12  | 0.08 | 0.00 | 0.00 | 0.04 | 0.00 | 0.00 | 0.08 | 0.08  | 0.00 | 0.08 | 0.04 | 0.00 | 0.04  | 0.04 | 0.12 | 0.04 | 0.12 | 0.04 | 0.12 | 0.00 | 0.00 | 0.00 | 0.00 | 0.00 |      |
| 15/09/2011 | September | Zooplankton | <i>Mesocyclops edax</i>       | 0.21 | 0.01 | 0.11 | 0.00 | 3.64  | 1.51 | 0.37 | 0.04 | 2.00 | 0.03 | 2.83 | 0.82 | 0.56 | 0.09 | 0.26  | 0.15 | 0.05 | 0.06 | 0.05 | 0.03 | 0.02 | 0.38 | 0.34  | 0.02 | 0.14 | 0.02 | 0.00 | 0.32  | 0.02 | 0.06 | 0.07 | 0.06 | 0.02 | 0.06 | 0.19 | 0.00 | 0.02 | 0.02 | 0.00 |      |
| 23/05/2012 | May       | Zooplankton | <i>Mesocyclops edax</i>       | 2.96 | 0.01 | 0.23 | 0.00 | 5.92  | 2.55 | 0.01 | 0.03 | 1.93 | 0.04 | 2.50 | 2.12 | 1.73 | 0.00 | 2.41  | 0.13 | 0.02 | 0.09 | 0.17 | 0.13 | 0.07 | 1.46 | 3.64  | 0.02 | 0.13 | 0.03 | 0.01 | 6.12  | 0.03 | 0.06 | 0.19 | 0.20 | 0.11 | 0.00 | 0.13 | 0.08 | 0.05 | 0.01 | 0.00 |      |
| 23/05/2012 | May       | Zooplankton | <i>Mesocyclops edax</i>       | 2.40 | 0.01 | 0.19 | 0.00 | 5.33  | 2.12 | 0.01 | 0.03 | 1.78 | 0.03 | 2.09 | 1.78 | 1.46 | 0.00 | 1.97  | 0.09 | 0.01 | 0.07 | 0.13 | 0.10 | 0.05 | 1.12 | 2.97  | 0.01 | 0.10 | 0.03 | 0.01 | 4.95  | 0.02 | 0.05 | 0.17 | 0.16 | 0.09 | 0.00 | 0.10 | 0.07 | 0.04 | 0.01 | 0.00 |      |
| 06/07/2011 | July      | Seston      |                               | 0.41 | 0.01 | 0.09 | 0.00 | 1.43  | 1.44 | 0.04 | 0.01 | 0.48 | 0.00 | 0.22 | 0.20 | 0.43 | 0.03 | 0.18  | 0.03 | 0.01 | 0.00 | 0.01 | 0.01 | 0.00 | 0.09 | 0.43  | 0.00 | 0.04 | 0.00 | 0.00 | 0.09  | 0.01 | 0.07 | 0.01 | 0.15 | 0.07 | 0.01 | 0.03 | 0.00 | 0.00 | 0.00 | 0.06 | 0.06 |
| 06/07/2011 | July      | Seston      |                               | 0.63 | 0.02 | 0.14 | 0.00 | 2.82  | 2.22 | 0.07 | 0.01 | 0.78 | 0.00 | 0.69 | 0.56 | 0.72 | 0.08 | 0.55  | 0.06 | 0.03 | 0.00 | 0.02 | 0.01 | 0.01 | 0.16 | 0.49  | 0.01 | 0.09 | 0.01 | 0.00 | 0.25  | 0.02 | 0.11 | 0.08 | 0.21 | 0.12 | 0.01 | 0.05 | 0.00 | 0.00 | 0.00 | 0.19 | 0.19 |
| 06/07/2011 | July      | Seston      |                               | 0.58 | 0.02 | 0.11 | 0.00 | 2.32  | 1.53 | 0.05 | 0.01 | 0.63 | 0.00 | 0.39 | 0.34 | 0.48 | 0.05 | 0.30  | 0.03 | 0.02 | 0.00 | 0.01 | 0.00 | 0.00 | 0.07 | 0.21  | 0.00 | 0.05 | 0.01 | 0.00 | 0.10  | 0.01 | 0.07 | 0.01 | 0.15 | 0.08 | 0.01 | 0.03 | 0.00 | 0.00 | 0.00 | 0.10 | 0.10 |
| 06/07/2011 | July      | Seston      |                               | 0.51 | 0.02 | 0.10 | 0.00 | 1.47  | 1.45 | 0.04 | 0.01 | 0.41 | 0.00 | 0.21 | 0.15 | 0.32 | 0.03 | 0.15  | 0.02 | 0.01 | 0.00 | 0.01 | 0.00 | 0.00 | 0.06 | 0.31  | 0.00 | 0.03 | 0.00 | 0.00 | 0.06  | 0.01 | 0.06 | 0.00 | 0.10 | 0.08 | 0.01 | 0.02 | 0.00 | 0.00 | 0.00 | 0.05 | 0.05 |
| 08/09/2011 | September | Seston      |                               | 0.16 | 0.01 | 0.06 | 0.00 | 0.77  | 0.88 | 0.02 | 0.00 | 0.28 | 0.00 | 0.07 | 0.06 | 0.14 | 0.02 | 0.04  | 0.02 | 0.00 | 0.00 | 0.00 | 0.00 | 0.04 | 0.07 | 0.00  | 0.03 | 0.00 | 0.00 | 0.04 | 0.01  | 0.04 | 0.00 | 0.10 | 0.05 | 0.00 | 0.02 | 0.00 | 0.00 | 0.00 | 0.00 | 0.02 | 0.02 |
| 08/09/2011 | September | Seston      |                               | 0.38 | 0.02 | 0.09 | 0.00 | 1.17  | 1.55 | 0.04 | 0.01 | 0.51 | 0.00 | 0.14 | 0.10 | 0.21 | 0.03 | 0.08  | 0.02 | 0.01 | 0.00 | 0.01 | 0.00 | 0.00 | 0.06 | 0.11  | 0.01 | 0.04 | 0.00 | 0.00 | 0.06  | 0.01 | 0.06 | 0.02 | 0.19 | 0.10 | 0.01 | 0.03 | 0.00 | 0.00 | 0.00 | 0.03 | 0.03 |
| 08/09/2011 | September | Seston      |                               | 0.69 | 0.02 | 0.10 | 0.00 | 1.93  | 1.35 | 0.04 | 0.01 | 0.62 | 0.00 | 0.37 | 0.22 | 0.65 | 0.05 | 0.62  | 0.03 | 0.01 | 0.00 | 0.01 | 0.01 | 0.00 | 0.09 | 0.23  | 0.01 | 0.06 | 0.00 | 0.00 | 0.13  | 0.01 | 0.08 | 0.05 | 0.23 | 0.13 | 0.01 | 0.04 | 0.00 | 0.00 | 0.00 | 0.21 | 0.21 |
| 08/09/2011 | September | Seston      |                               | 0.56 | 0.02 | 0.07 | 0.00 | 1.65  | 1.19 | 0.04 | 0.01 | 0.56 | 0.00 | 0.40 | 0.21 | 0.62 | 0.05 | 0.61  | 0.03 | 0.01 | 0.00 | 0.01 | 0.01 | 0.00 | 0.09 | 0.23  | 0.01 | 0.06 | 0.00 | 0.00 | 0.15  | 0.01 | 0.07 | 0.01 | 0.20 | 0.11 | 0.01 | 0.04 | 0.00 | 0.00 | 0.00 | 0.21 | 0.21 |
| 04/12/2011 | December  | Seston      |                               | 0.55 | 0.02 | 0.17 | 0.00 | 1.73  | 1.22 | 0.06 | 0.01 | 0.47 | 0.00 | 0.50 | 0.26 | 0.39 | 0.04 | 0.38  | 0.05 | 0.01 | 0.00 | 0.01 | 0.01 | 0.01 | 0.05 | 0.25  | 0.01 | 0.09 | 0.01 | 0.01 | 0.14  | 0.02 |      |      |      |      |      |      |      |      |      |      |      |

|            |           |        |      |      |      |      |       |      |      |      |       |      |      |      |      |      |      |      |      |      |      |      |      |      |      |      |      |      |      |      |      |      |      |      |      |      |      |      |      |      |      |      |      |      |
|------------|-----------|--------|------|------|------|------|-------|------|------|------|-------|------|------|------|------|------|------|------|------|------|------|------|------|------|------|------|------|------|------|------|------|------|------|------|------|------|------|------|------|------|------|------|------|------|
| 16/05/2012 | May       | Seston | 1.13 | 0.01 | 0.10 | 0.00 | 1.85  | 2.29 | 0.03 | 0.01 | 0.46  | 0.00 | 0.33 | 0.51 | 0.48 | 0.07 | 0.81 | 0.04 | 0.01 | 0.00 | 0.01 | 0.00 | 0.01 | 0.25 | 0.66 | 0.01 | 0.07 | 0.01 | 0.00 | 0.45 | 0.01 | 0.07 | 0.01 | 0.18 | 0.13 | 0.01 | 0.00 | 0.00 | 0.00 | 0.00 | 0.00 | 0.28 |      |      |
| 13/06/2012 | June      | Seston | 4.16 | 0.04 | 0.56 | 0.02 | 8.50  | 5.93 | 0.01 | 0.04 | 1.33  | 0.00 | 3.00 | 0.63 | 0.92 | 0.00 | 0.69 | 0.15 | 0.00 | 0.00 | 0.01 | 0.00 | 0.00 | 0.18 | 0.45 | 0.01 | 0.35 | 0.02 | 0.00 | 0.17 | 0.03 | 0.15 | 0.00 | 0.06 | 0.03 | 0.01 | 0.05 | 0.00 | 0.00 | 0.00 | 0.00 | 0.00 |      |      |
| 13/06/2012 | June      | Seston | 3.79 | 0.04 | 0.50 | 0.02 | 7.67  | 5.35 | 0.00 | 0.03 | 1.15  | 0.00 | 2.61 | 0.55 | 0.85 | 0.00 | 0.62 | 0.10 | 0.00 | 0.00 | 0.01 | 0.00 | 0.00 | 0.16 | 0.40 | 0.01 | 0.30 | 0.02 | 0.00 | 0.14 | 0.02 | 0.13 | 0.00 | 0.05 | 0.03 | 0.01 | 0.05 | 0.00 | 0.00 | 0.00 | 0.00 | 0.00 |      |      |
| 13/06/2012 | June      | Seston | 1.82 | 0.07 | 0.30 | 0.02 | 3.91  | 3.36 | 0.00 | 0.02 | 0.64  | 0.00 | 1.27 | 0.23 | 0.45 | 0.00 | 0.30 | 0.07 | 0.00 | 0.00 | 0.00 | 0.00 | 0.00 | 0.06 | 0.26 | 0.00 | 0.15 | 0.01 | 0.00 | 0.06 | 0.01 | 0.07 | 0.00 | 0.03 | 0.05 | 0.00 | 0.03 | 0.00 | 0.00 | 0.00 | 0.00 | 0.00 |      |      |
| 13/06/2012 | June      | Seston | 1.94 | 0.03 | 0.32 | 0.02 | 4.30  | 0.38 | 0.00 | 0.02 | 0.68  | 0.00 | 1.36 | 0.25 | 0.47 | 0.00 | 0.30 | 0.07 | 0.00 | 0.00 | 0.00 | 0.00 | 0.00 | 0.06 | 0.26 | 0.00 | 0.15 | 0.01 | 0.00 | 0.06 | 0.00 | 0.07 | 0.00 | 0.03 | 0.05 | 0.00 | 0.03 | 0.00 | 0.00 | 0.00 | 0.00 | 0.00 |      |      |
| 04/07/2012 | July      | Seston | 0.07 | 0.00 | 0.02 | 0.01 | 0.93  | 0.51 | 0.02 | 0.01 | 0.37  | 0.02 | 0.19 | 0.10 | 0.21 | 0.03 | 0.06 | 0.01 | 0.00 | 0.00 | 0.00 | 0.00 | 0.00 | 0.02 | 0.05 | 0.00 | 0.01 | 0.00 | 0.01 | 0.00 | 0.00 | 0.01 | 0.00 | 0.01 | 0.01 | 0.00 | 0.01 | 0.01 | 0.00 | 0.01 | 0.00 | 0.00 | 0.00 |      |
| 04/07/2012 | July      | Seston | 0.15 | 0.01 | 0.03 | 0.01 | 1.26  | 0.53 | 0.02 | 0.01 | 0.36  | 0.00 | 0.23 | 0.14 | 0.21 | 0.03 | 0.09 | 0.01 | 0.00 | 0.00 | 0.00 | 0.00 | 0.00 | 0.03 | 0.04 | 0.00 | 0.01 | 0.00 | 0.00 | 0.00 | 0.00 | 0.01 | 0.00 | 0.02 | 0.01 | 0.00 | 0.00 | 0.01 | 0.00 | 0.01 | 0.00 | 0.00 | 0.00 |      |
| 04/07/2012 | July      | Seston | 2.70 | 0.03 | 0.31 | 0.01 | 7.67  | 5.09 | 0.09 | 0.03 | 0.76  | 0.00 | 2.36 | 0.72 | 0.90 | 0.00 | 0.38 | 0.06 | 0.00 | 0.00 | 0.01 | 0.01 | 0.00 | 0.12 | 0.21 | 0.01 | 0.10 | 0.00 | 0.00 | 0.06 | 0.01 | 0.05 | 0.00 | 0.03 | 0.01 | 0.00 | 0.03 | 0.00 | 0.01 | 0.00 | 0.01 | 0.00 | 0.00 |      |
| 04/07/2012 | July      | Seston | 3.92 | 0.07 | 0.46 | 0.02 | 10.74 | 6.89 | 0.02 | 0.02 | 0.99  | 0.00 | 3.26 | 0.96 | 1.11 | 0.00 | 0.48 | 0.08 | 0.00 | 0.00 | 0.01 | 0.00 | 0.01 | 0.16 | 0.28 | 0.01 | 0.14 | 0.01 | 0.00 | 0.08 | 0.01 | 0.07 | 0.00 | 0.02 | 0.02 | 0.01 | 0.04 | 0.00 | 0.01 | 0.00 | 0.01 | 0.00 | 0.00 |      |
| 04/07/2012 | July      | Seston | 2.93 | 0.08 | 0.39 | 0.02 | 7.44  | 5.59 | 0.10 | 0.03 | 0.72  | 0.00 | 1.90 | 0.46 | 0.94 | 0.08 | 0.24 | 0.05 | 0.00 | 0.00 | 0.01 | 0.01 | 0.00 | 0.08 | 0.18 | 0.01 | 0.11 | 0.00 | 0.00 | 0.05 | 0.01 | 0.05 | 0.00 | 0.04 | 0.03 | 0.01 | 0.04 | 0.00 | 0.00 | 0.00 | 0.00 | 0.00 | 0.00 |      |
| 04/07/2012 | July      | Seston | 2.31 | 0.09 | 0.31 | 0.01 | 5.38  | 0.14 | 0.01 | 0.03 | 0.58  | 0.00 | 1.37 | 0.33 | 0.71 | 0.00 | 0.18 | 0.04 | 0.00 | 0.00 | 0.01 | 0.01 | 0.00 | 0.06 | 0.14 | 0.01 | 0.08 | 0.00 | 0.00 | 0.04 | 0.01 | 0.04 | 0.00 | 0.04 | 0.02 | 0.00 | 0.03 | 0.00 | 0.01 | 0.00 | 0.01 | 0.00 | 0.00 |      |
| 20/07/2012 | July      | Seston | 3.29 | 0.03 | 0.34 | 0.02 | 8.06  | 4.88 | 0.01 | 0.03 | 0.87  | 0.00 | 2.10 | 0.53 | 0.85 | 0.00 | 0.44 | 0.08 | 0.00 | 0.00 | 0.01 | 0.01 | 0.00 | 0.09 | 0.20 | 0.01 | 0.09 | 0.00 | 0.00 | 0.07 | 0.01 | 0.06 | 0.00 | 0.03 | 0.02 | 0.00 | 0.06 | 0.00 | 0.01 | 0.03 | 0.00 | 0.00 | 0.00 |      |
| 20/07/2012 | July      | Seston | 2.48 | 0.02 | 0.26 | 0.02 | 6.06  | 3.74 | 0.01 | 0.02 | 0.68  | 0.00 | 1.64 | 0.41 | 0.67 | 0.00 | 0.35 | 0.06 | 0.00 | 0.00 | 0.01 | 0.01 | 0.00 | 0.07 | 0.16 | 0.01 | 0.07 | 0.00 | 0.00 | 0.06 | 0.01 | 0.05 | 0.00 | 0.02 | 0.01 | 0.00 | 0.04 | 0.00 | 0.01 | 0.02 | 0.00 | 0.00 | 0.00 |      |
| 20/07/2012 | July      | Seston | 1.72 | 0.03 | 0.30 | 0.00 | 4.30  | 0.59 | 0.01 | 0.07 | 0.49  | 0.00 | 1.11 | 0.27 | 0.79 | 0.00 | 0.24 | 0.04 | 0.00 | 0.00 | 0.01 | 0.01 | 0.00 | 0.05 | 0.15 | 0.01 | 0.07 | 0.00 | 0.00 | 0.04 | 0.01 | 0.03 | 0.00 | 0.02 | 0.02 | 0.04 | 0.04 | 0.00 | 0.01 | 0.01 | 0.00 | 0.00 | 0.00 |      |
| 20/07/2012 | July      | Seston | 1.81 | 0.03 | 0.32 | 0.01 | 4.50  | 0.61 | 0.02 | 0.06 | 0.47  | 0.00 | 1.12 | 0.28 | 0.80 | 0.00 | 0.25 | 0.04 | 0.00 | 0.00 | 0.01 | 0.01 | 0.00 | 0.05 | 0.16 | 0.01 | 0.07 | 0.00 | 0.00 | 0.04 | 0.01 | 0.03 | 0.00 | 0.03 | 0.03 | 0.05 | 0.04 | 0.00 | 0.01 | 0.01 | 0.00 | 0.00 | 0.00 |      |
| 06/08/2012 | August    | Seston | 2.30 | 0.02 | 0.25 | 0.01 | 8.10  | 4.63 | 0.09 | 0.03 | 13.73 | 0.00 | 1.49 | 0.38 | 0.59 | 0.00 | 0.27 | 0.08 | 0.00 | 0.00 | 0.00 | 0.00 | 0.06 | 0.13 | 0.01 | 0.07 | 0.01 | 0.00 | 0.04 | 0.01 | 0.04 | 0.00 | 0.02 | 0.01 | 0.00 | 0.02 | 0.00 | 0.00 | 0.00 | 0.00 | 0.00 | 0.00 | 0.00 |      |
| 06/08/2012 | August    | Seston | 2.38 | 0.01 | 0.25 | 0.01 | 8.67  | 4.34 | 0.09 | 0.03 | 16.29 | 0.00 | 1.55 | 0.38 | 0.63 | 0.00 | 0.28 | 0.08 | 0.00 | 0.00 | 0.01 | 0.01 | 0.00 | 0.07 | 0.13 | 0.00 | 0.07 | 0.00 | 0.00 | 0.04 | 0.01 | 0.04 | 0.00 | 0.02 | 0.01 | 0.00 | 0.02 | 0.00 | 0.00 | 0.00 | 0.00 | 0.00 | 0.00 |      |
| 06/08/2012 | August    | Seston | 1.86 | 0.02 | 0.38 | 0.01 | 6.58  | 0.92 | 0.01 | 0.04 | 7.98  | 0.00 | 1.07 | 0.25 | 0.67 | 0.00 | 0.21 | 0.05 | 0.00 | 0.00 | 0.01 | 0.01 | 0.00 | 0.05 | 0.15 | 0.00 | 0.06 | 0.00 | 0.00 | 0.04 | 0.00 | 0.03 | 0.00 | 0.02 | 0.02 | 0.00 | 0.02 | 0.00 | 0.02 | 0.00 | 0.00 | 0.00 | 0.00 | 0.00 |
| 06/08/2012 | August    | Seston | 2.39 | 0.11 | 0.59 | 0.01 | 7.27  | 1.02 | 0.01 | 0.05 | 10.08 | 0.00 | 1.29 | 0.29 | 0.71 | 0.00 | 0.23 | 0.06 | 0.00 | 0.00 | 0.01 | 0.01 | 0.00 | 0.05 | 0.16 | 0.01 | 0.06 | 0.00 | 0.00 | 0.05 | 0.01 | 0.03 | 0.00 | 0.02 | 0.02 | 0.01 | 0.03 | 0.00 | 0.00 | 0.00 | 0.00 | 0.00 | 0.00 |      |
| 21/08/2012 | August    | Seston | 1.98 | 0.04 | 0.30 | 0.01 | 6.80  | 3.69 | 0.01 | 0.02 | 8.81  | 0.00 | 1.78 | 0.40 | 0.78 | 0.00 | 0.26 | 0.07 | 0.00 | 0.00 | 0.01 | 0.01 | 0.00 | 0.06 | 0.15 | 0.00 | 0.06 | 0.01 | 0.00 | 0.04 | 0.01 | 0.04 | 0.00 | 0.01 | 0.01 | 0.01 | 0.01 | 0.00 | 0.00 | 0.00 | 0.00 | 0.00 | 0.00 |      |
| 21/08/2012 | August    | Seston | 1.91 | 0.04 | 0.26 | 0.01 | 5.95  | 3.63 | 0.01 | 0.02 | 4.64  | 0.00 | 1.67 | 0.39 | 0.74 | 0.00 | 0.25 | 0.06 | 0.00 | 0.00 | 0.01 | 0.01 | 0.00 | 0.05 | 0.14 | 0.01 | 0.06 | 0.01 | 0.00 | 0.05 | 0.00 | 0.03 | 0.00 | 0.01 | 0.01 | 0.00 | 0.03 | 0.00 | 0.01 | 0.00 | 0.01 | 0.00 | 0.00 |      |
| 21/08/2012 | August    | Seston | 2.17 | 0.06 | 0.59 | 0.01 | 5.35  | 1.90 | 0.00 | 0.05 | 6.52  | 0.00 | 1.14 | 0.29 | 0.80 | 0.00 | 0.29 | 0.05 | 0.00 | 0.00 | 0.01 | 0.01 | 0.00 | 0.05 | 0.17 | 0.00 | 0.05 | 0.01 | 0.00 | 0.04 | 0.01 | 0.03 | 0.00 | 0.03 | 0.03 | 0.05 | 0.03 | 0.00 | 0.00 | 0.00 | 0.00 | 0.00 | 0.00 |      |
| 21/08/2012 | August    | Seston | 2.08 | 0.04 | 0.59 | 0.01 | 5.18  | 1.86 | 0.00 | 0.05 | 5.99  | 0.00 | 1.09 | 0.31 | 0.92 | 0.00 | 0.35 | 0.04 | 0.00 | 0.00 | 0.01 | 0.00 | 0.00 | 0.06 | 0.19 | 0.00 | 0.04 | 0.01 | 0.00 | 0.05 | 0.00 | 0.02 | 0.00 | 0.03 | 0.02 | 0.04 | 0.03 | 0.00 | 0.00 | 0.00 | 0.00 | 0.00 | 0.00 |      |
| 05/09/2012 | September | Seston | 2.35 | 0.03 | 0.26 | 0.01 | 6.61  | 0.69 | 0.02 | 0.02 | 4.63  | 0.00 | 1.33 | 0.23 | 0.50 | 0.07 | 0.19 | 0.06 | 0.00 | 0.00 | 0.00 | 0.00 | 0.05 | 0.10 | 0.00 | 0.06 | 0.00 | 0.00 | 0.04 | 0.01 | 0.02 | 0.00 | 0.03 | 0.02 | 0.03 | 0.02 | 0.04 | 0.03 | 0.00 | 0.01 | 0.00 | 0.00 | 0.00 |      |
| 05/09/2012 | September | Seston | 1.81 | 0.04 | 0.20 | 0.01 | 4.97  | 3.54 | 0.01 | 0.01 | 5.18  | 0.00 | 1.15 | 0.21 | 0.49 | 0.00 | 0.18 | 0.04 | 0.00 | 0.00 | 0.00 | 0.00 | 0.00 | 0.04 | 0.10 | 0.00 | 0.04 | 0.00 | 0.00 | 0.04 | 0.01 | 0.02 | 0.00 | 0.02 | 0.01 | 0.02 | 0.02 | 0.02 | 0.00 | 0.00 | 0.00 | 0.00 | 0.00 |      |
| 05/09/2012 | September | Seston | 1.58 | 0.02 | 0.26 | 0.01 | 4.35  | 2.29 | 0.06 | 0.02 | 3.92  | 0.00 | 0.84 | 0.13 | 0.36 | 0.07 | 0.09 | 0.03 | 0.00 | 0.00 | 0.00 | 0.00 | 0.00 | 0.04 | 0.10 | 0.00 | 0.04 | 0.00 | 0.00 | 0.03 | 0.01 | 0.03 | 0.00 | 0.02 | 0.02 | 0.03 | 0.02 | 0.00 | 0.01 | 0.00 | 0.00 | 0.00 | 0.00 |      |
| 05/09/2012 | September | Seston | 1.34 | 0.05 | 0.22 | 0.01 | 3.31  | 0.26 | 0.01 | 0.02 | 1.83  | 0.00 | 0.66 | 0.10 | 0.28 | 0.05 | 0.06 | 0.03 | 0.00 | 0.00 | 0.00 | 0.00 | 0.00 | 0.03 | 0.07 | 0.00 | 0.03 | 0.00 | 0.00 | 0.02 | 0.00 | 0.02 | 0.00 | 0.02 | 0.01 | 0.00 | 0.02 | 0.00 | 0.01 | 0.00 | 0.00 | 0.00 | 0.00 |      |
| 19/09/2012 | September | Seston | 1.39 | 0.01 | 0.13 | 0.00 | 3.70  | 2.92 | 0.01 | 0.02 | 1.84  | 0.00 | 1.17 | 0.24 | 0.41 | 0.00 | 0.15 | 0.03 | 0.00 | 0.00 | 0.00 | 0.00 | 0.00 | 0.03 | 0.08 | 0.00 | 0.04 | 0.00 | 0.00 | 0.03 | 0.01 | 0.02 | 0.00 | 0.02 | 0.01 | 0.03 | 0.02 | 0.00 | 0.01 | 0.00 | 0.00 | 0.00 | 0.00 |      |
| 19/09/2012 | September | Seston | 1.19 | 0.01 | 0.11 | 0.00 | 3.17  | 2.72 | 0.01 | 0.02 | 1.78  | 0.00 | 1.04 | 0.21 | 0.40 | 0.00 | 0.14 | 0.03 | 0.00 | 0.00 | 0.00 | 0.00 | 0.00 | 0.03 | 0.08 | 0.00 | 0.03 | 0.00 | 0.00 | 0.03 | 0.00 | 0.02 | 0.00 | 0.01 | 0.01 | 0.02 | 0.01 | 0.00 | 0.00 | 0.00 | 0.00 | 0.00 | 0.00 |      |
| 03/10/2012 | October   | Seston | 1.58 | 0.01 | 0.12 | 0.00 | 3.61  | 0.43 | 0.01 | 0.02 | 1.07  | 0.00 | 1.13 | 0.24 | 0.48 | 0.00 | 0.21 | 0.03 | 0.00 | 0.00 | 0.00 | 0.00 | 0.00 | 0.03 | 0.11 | 0.00 | 0.04 | 0.00 | 0.00 | 0.04 | 0.01 | 0.02 | 0.00 | 0.01 | 0.01 | 0.00 | 0.01 | 0.00 | 0.01 | 0.00 | 0.01 | 0.00 | 0.00 |      |
| 03/10/2012 | October   | Seston | 1.52 | 0.02 | 0.13 | 0.00 | 3.34  | 0.39 | 0.01 | 0.02 | 1.26  | 0.00 | 1.12 | 0.25 | 0.54 | 0.00 | 0.25 | 0.03 | 0.00 | 0.00 | 0.00 | 0.00 | 0.00 | 0.03 | 0.13 | 0.00 | 0.04 | 0.00 | 0.00 | 0.05 | 0.01 | 0.02 | 0.00 | 0.01 |      |      |      |      |      |      |      |      |      |      |

**Figure**

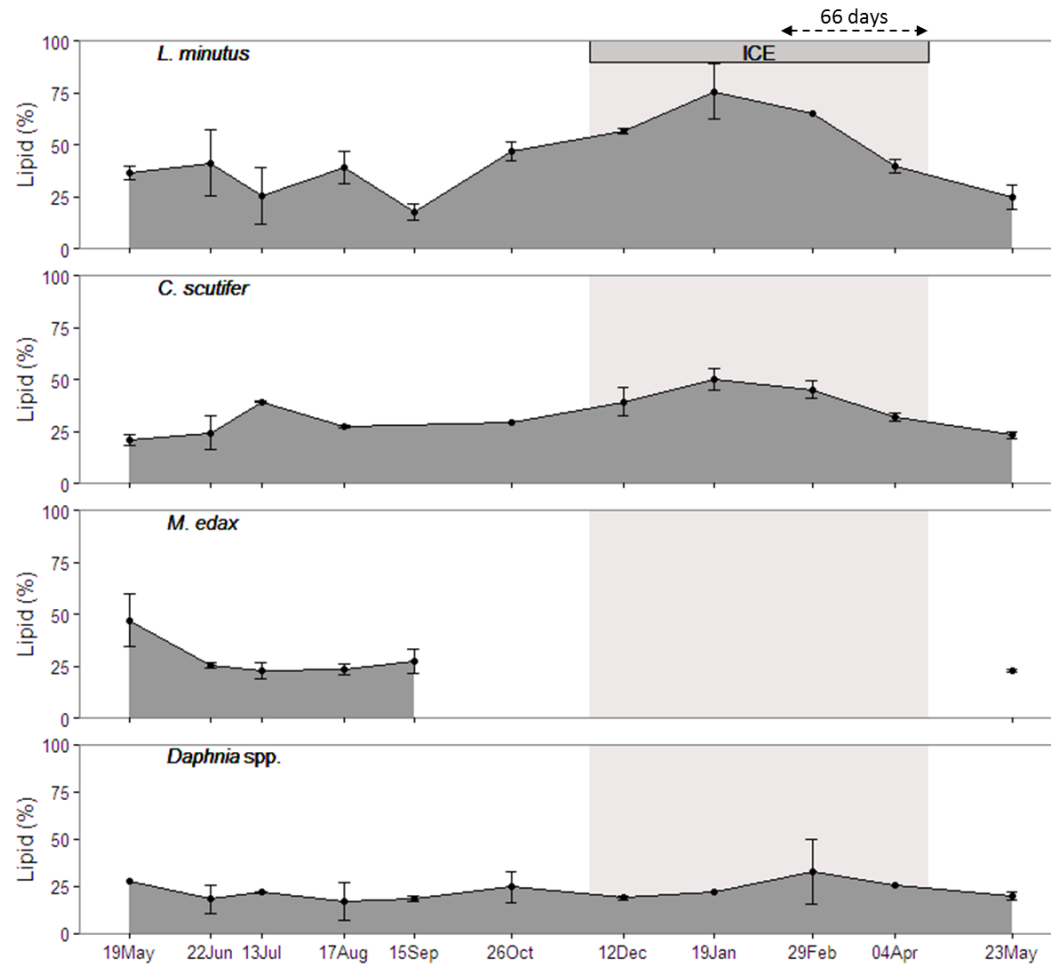

**Figure S1**

Seasonal pattern of lipid content (%) in 4 different species of zooplankton. Grey shade represents the period when the lake was ice covered. The gap in *M. edax* represents a period of the year when all individuals were absent of the pelagic environment.

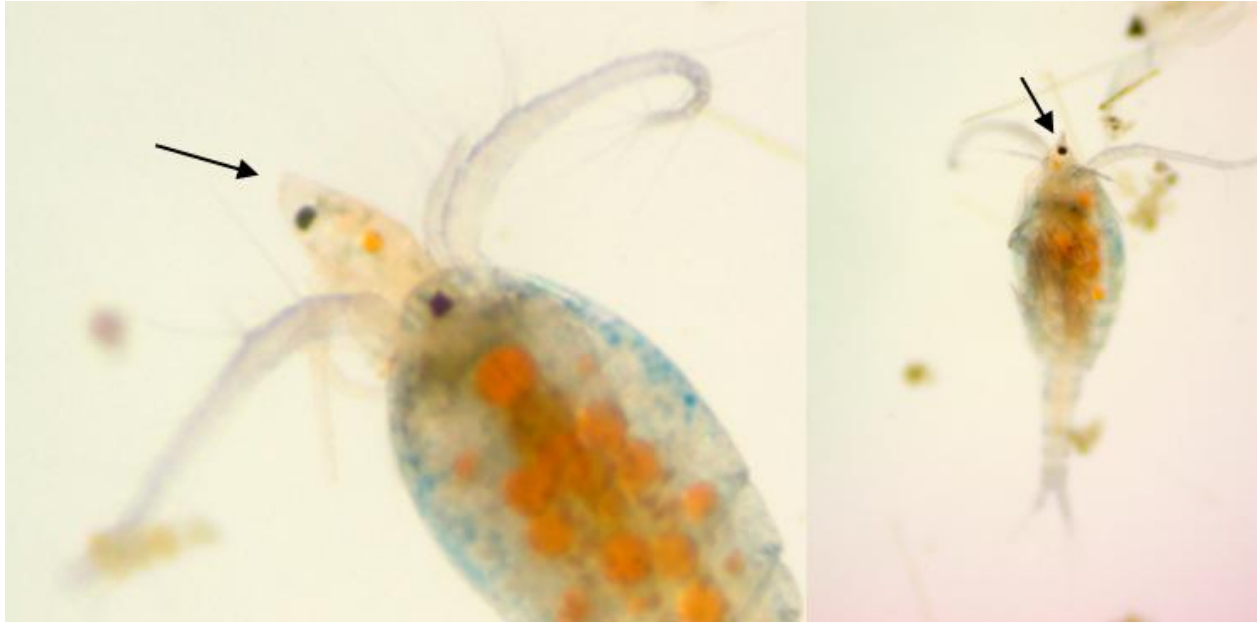

**Figure S2**  
*Mesocyclops edax* feeding on a *Daphnia* sp. Arrows indicates the prey *Daphnia* sp.



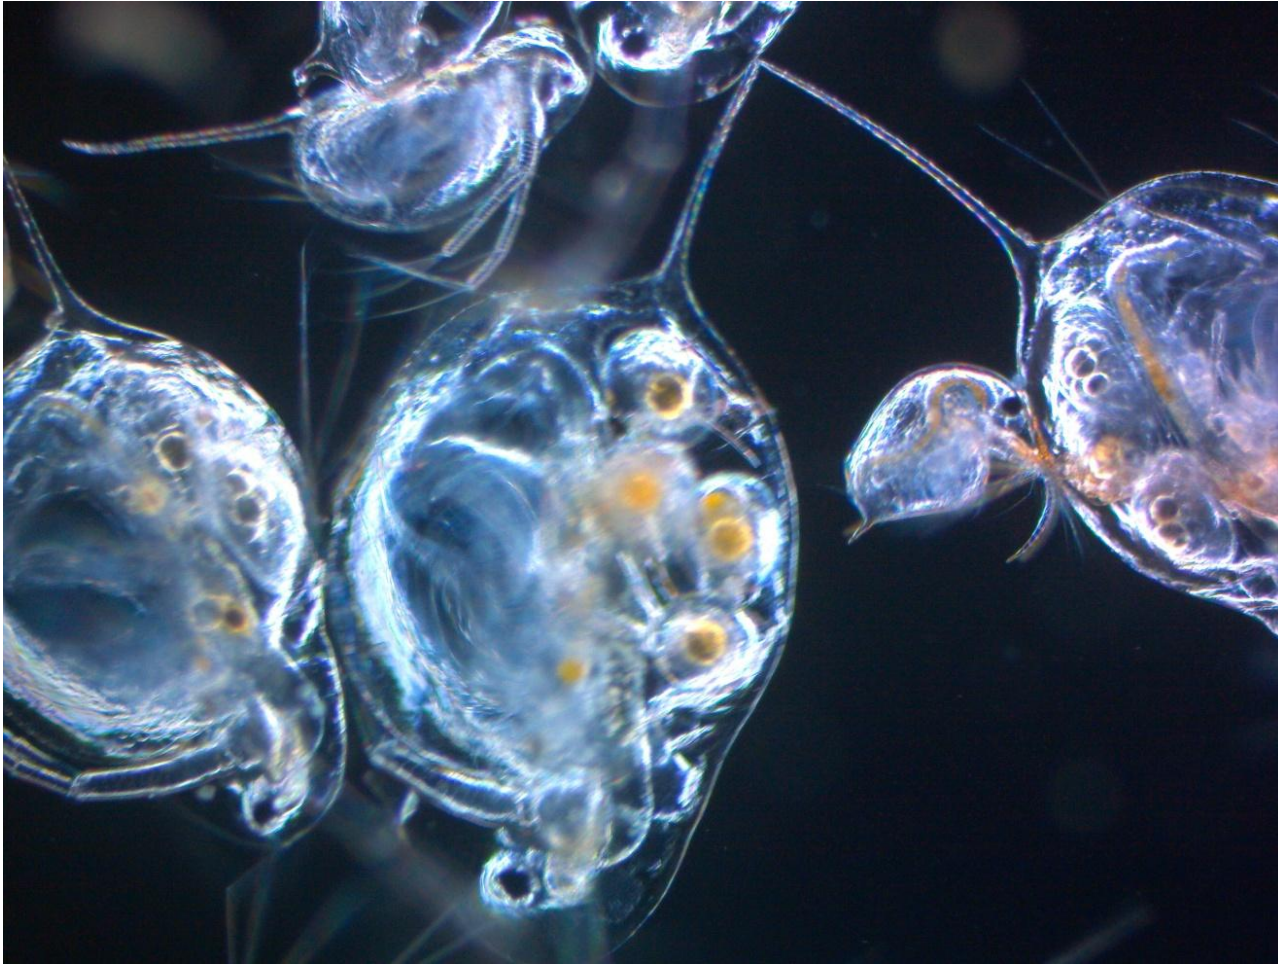

**Figure S3**

*Daphnia* spp. with parthenogenetic eggs and young (27 January 2017)
